# Supplementary material
Source: ML conference proceedings conference paper supplement (https://openaccess.thecvf.com/content/cvpr_2017/html/Elhoseiny_Link_the_Head_2017_CVPR_paper.html)
Supplement: Supplementary file 1 [file Elhoseiny_Link_the_Head_2017_CVPR_supplemental.pdf.pdf]

# Link the head to the “peak”: Zero Shot Learning from Noisy Text description at Part Precision Supplementary Materials

Mohamed Elhoseiny<sup>1,2\*</sup>, Yizhe Zhu<sup>1\*</sup>, Han Zhang<sup>1</sup>, and Ahmed Elgammal<sup>1</sup>  
 elhoseiny@fb.com, yizhe.zhu@rutgers.edu, {han.zhang, elgammal}@cs.rutgers.edu  
<sup>1</sup>Rutgers University, Department of Computer Science, <sup>2</sup> Facebook Research

This supplementary document includes the following sections. For reproducing the results, our code, data, and models are publically available [link \[1\]](#).

1.  $\lambda_1$  and  $\lambda_2$  Setting in Experiments.
2. Gradient Derivations
3. More Qualitative Examples
4. More Figures and Detailed Results

## 1. $\lambda_1$ and $\lambda_2$ Setting

Similar to methods in the literature (e.g., [3, 2]), we learn the hyper-parameters by cross validation (CV) on the validation set, with the grid search in the range of  $10^{[3:6]}$  for both  $\lambda_1$  and  $\lambda_2$  (i.e.,  $4 \times 4$  grid).

1. *CUB (Easy Split)* :  $\lambda_1 = 10^5$  and  $\lambda_2 = 10^4$ .
2. *NABirds (Easy Split)*:  $\lambda_1 = 10^5$  and  $\lambda_2 = 10^4$ .
3. *CUB (Hard Split)*:  $\lambda_1 = 10^6$  and  $\lambda_2 = 10^4$
4. *NABirds (Hard Split)*:  $\lambda_1 = 10^6$  and  $\lambda_2 = 10^5$ .

We find it intuitive to see higher values lambdas after cross-validation for the *Hard Split* since regularization becomes more important as shared information gets smaller. Moreover, we did not find the method very sensitive to the hyper parameters. For instance, the performance on *CUB (Easy Split)* with  $\lambda_1 = 10^5$ , the performance of  $\lambda_2 = 10^3$ ,  $\lambda_2 = 10^4$ , and  $\lambda_2 = 10^5$  are 35.4%, 37.2%, and 35.9%, respectively.

## 2. Gradient Derivations

### 2.1. Gradients for Equation 5 : Fix $\mathbf{W}_t$ , and optimize over $\mathbf{W}_x$

We name the loss in Equation 3 in the paper as  $L$ .

Let  $\mathbf{X} = [\mathbf{X}^{(1)}, \mathbf{X}^{(2)} \dots \mathbf{X}^{(P)}] \in \mathbb{R}^{d \times P \cdot d_x}$ .

Let  $\mathbf{W}_x^T = [\mathbf{W}_x^1; \mathbf{W}_x^2; \dots; \mathbf{W}_x^P]$ , where  $\mathbf{W}_x^p \in \mathbb{R}^{d_x \times d}$ ; and  $\mathbf{W}_t \in \mathbb{R}^{d \times d_T}$ .

(a) **The first term:**

$$\left\| \left( \sum_{p=1}^P \mathbf{X}^{(p)T} \mathbf{W}_x^{pT} \right) \mathbf{W}_t \mathbf{T} - \mathbf{Y} \right\|_F^2 = \left\| \mathbf{X}^T \mathbf{W}_x^T \mathbf{W}_t \mathbf{T} - \mathbf{Y} \right\|_F^2 = \text{Tr} \left( (\mathbf{X}^T \mathbf{W}_x^T \mathbf{W}_t \mathbf{T} - \mathbf{Y}) (\mathbf{X}^T \mathbf{W}_x^T \mathbf{W}_t \mathbf{T} - \mathbf{Y})^T \right) \quad (1)$$

---

\* Both authors contributed equally to this work

We can get the derivative of **the first term** in the objective function w.r.t.  $\mathbf{W}_x^P$ :

$$\frac{\partial \|\mathbf{X}^T \mathbf{W}_x^T \mathbf{W}_t \mathbf{T} - \mathbf{Y}\|_F^2}{\partial \mathbf{W}_x^P} = 2\mathbf{W}_t \mathbf{T} \mathbf{T}^T \mathbf{W}_t^T \mathbf{W}_x \mathbf{X}^{(p)} \mathbf{X}^{(p)T} - 2\mathbf{W}_t \mathbf{T} \mathbf{Y}^T \mathbf{X}^{(p)T} \quad (2)$$

(b) The derivative of **the second term** in the objective function w.r.t. every part  $\mathbf{W}_x^P$ .

$$\frac{\partial \lambda_1 \|\mathbf{W}_x^T \mathbf{W}_t \mathbf{T}\|_F^2}{\partial \mathbf{W}_x^P} = 2\lambda_1 \mathbf{W}_t \mathbf{T} \mathbf{T}^T \mathbf{W}_t^T \mathbf{W}_x^P \quad (3)$$

(c) For **the third term** in the objective function, we do the partial derivative for each part:

$$\lambda_2 \text{Tr}(\mathbf{W}_x^P \mathbf{W}_t \mathbf{D}_l^p \mathbf{W}_t^T \mathbf{W}_x^{PT}) \quad (4)$$

The derivative of **the third term** in the objective function w.r.t. every part  $\mathbf{W}_x^P$ :

$$\frac{\partial \lambda_2 \text{Tr}(\mathbf{W}_x^P \mathbf{W}_t \mathbf{D}_l^p \mathbf{W}_t^T \mathbf{W}_x^{PT})}{\partial \mathbf{W}_x^P} = 2\lambda_2 \mathbf{W}_x^P \mathbf{W}_t \mathbf{D}_l^p \mathbf{W}_t^T \quad (5)$$

Therefore, the partial derivative of the loss function w.r.t.  $\mathbf{W}_x^P$  is:

$$\frac{\partial L}{\partial \mathbf{W}_x^P} = 2\mathbf{W}_t \mathbf{T} \mathbf{T}^T \mathbf{W}_t^T \mathbf{W}_x \mathbf{X}^{(p)} \mathbf{X}^{(p)T} - 2\mathbf{W}_t \mathbf{T} \mathbf{Y}^T \mathbf{X}^{(p)T} + 2\lambda_1 \mathbf{W}_t \mathbf{T} \mathbf{T}^T \mathbf{W}_t^T \mathbf{W}_x^P + 2\lambda_2 \mathbf{W}_x^P \mathbf{W}_t \mathbf{D}_l^p \mathbf{W}_t^T \quad (6)$$

## 2.2. Gradients for Equation 4: Fix $\mathbf{W}_x^P$ , and optimize over $\mathbf{W}_t$

The loss function is rewritten as:

$$L = \|\mathbf{X}^T \mathbf{W}_x^T \mathbf{W}_t \mathbf{T} - \mathbf{Y}\|_F^2 + \lambda_1 \|\mathbf{W}_x^T \mathbf{W}_t \mathbf{T}\|_F^2 + \lambda_2 \sum_{p=1}^P \text{Tr}(\mathbf{W}_x^P \mathbf{W}_t \mathbf{D}_l^p \mathbf{W}_t^T \mathbf{W}_x^{PT}) \quad (7)$$

The partial derivative over  $\mathbf{W}_t$ :

$$\frac{\partial L}{\partial \mathbf{W}_t} = 2\mathbf{W}_x \mathbf{X} \mathbf{X}^T \mathbf{W}_x^T \mathbf{W}_t \mathbf{T} \mathbf{T}^T - 2\mathbf{W}_x \mathbf{X} \mathbf{Y}^T \mathbf{T}^T + 2\lambda_1 \mathbf{W}_x \mathbf{W}_x^T \mathbf{W}_t \mathbf{T} \mathbf{T}^T + 2\lambda_2 \sum_{i=1}^P \mathbf{W}_x^{PT} \mathbf{W}_x^P \mathbf{W}_t \mathbf{D}_l^i \quad (8)$$

## 3. More Qualitative Results

We show more qualitative examples in this section.

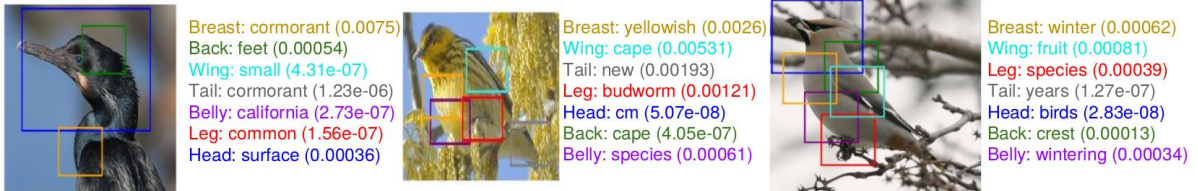

Figure 1: Part-to-Term connectivity demonstrated on falsely labeled samples

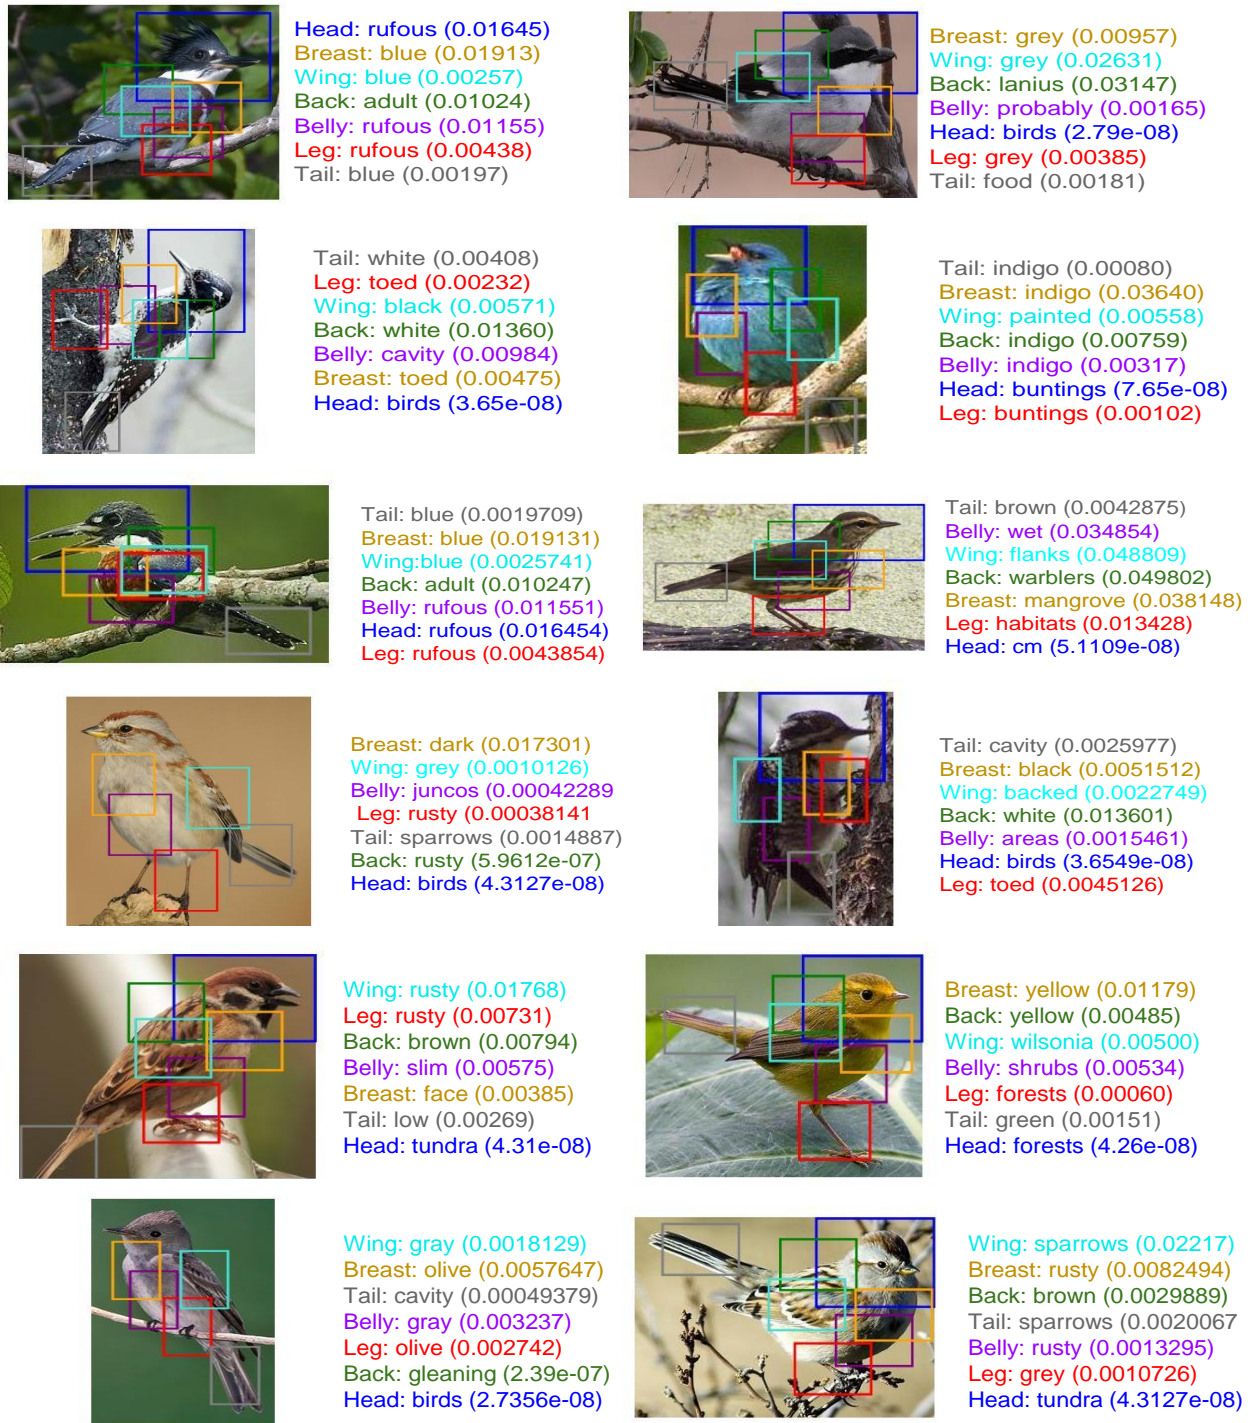

Figure 2: Part-to-Term connectivity demonstrated on correctly labeled samples

## 4. More Figures and Detailed Results

More Generalized Zero-Shot Learning Curves; see the captions for the corresponding benchmark.

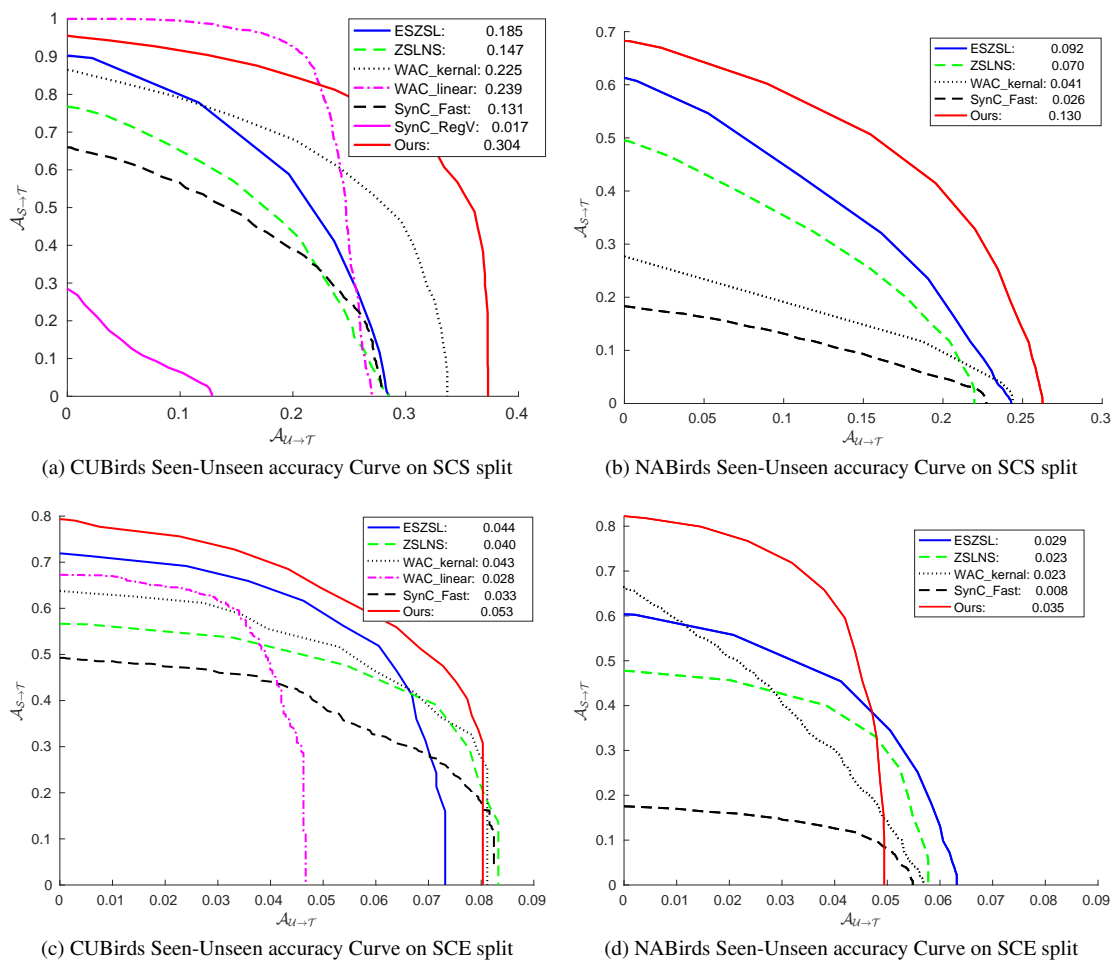

Figure 3: Result comparison with Seen-Unseen accuracy Curves on different split settings.

## References

- [1] Our implementation: ZSL PP. [https://github.com/EthanZhu90/ZSL\\_PP](https://github.com/EthanZhu90/ZSL_PP), 2017. 1
- [2] R. Qiao, L. Liu, C. Shen, and A. v. d. Hengel. Less is more: zero-shot learning from online textual documents with noise suppression. In *Computer Vision and Pattern Recognition (CVPR), 2016 IEEE Conference on*, year=2016. 1
- [3] B. Romera-Paredes and P. Torr. An embarrassingly simple approach to zero-shot learning. In *Proceedings of The 32nd International Conference on Machine Learning*, pages 2152–2161, 2015. 1
